# Supplementary material for: Yeast homologues of lethal giant larvae and type V myosin cooperate in the regulation of Rab-dependent vesicle clustering and polarized exocytosis
Source: PubMed Central journal article supplement — Mol Biol Cell. 2011 Mar 15;22(6):842–57. doi: 10.1091/mbc.E10-07-0570 (PMC3057708; doi:10.1091/mbc.e10-07-0570), 2011-03-15
Supplement: E10-07-0570_1.pdf [file E10-07-0570_1.pdf]

A.

WT

YPD 32°C

YPD 25°C

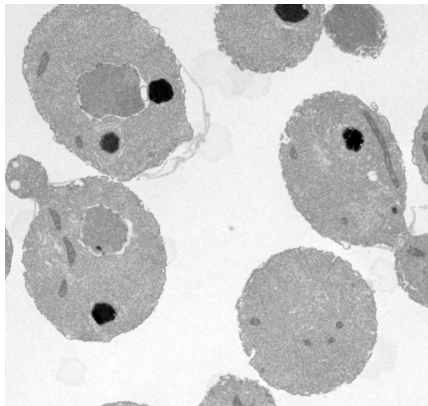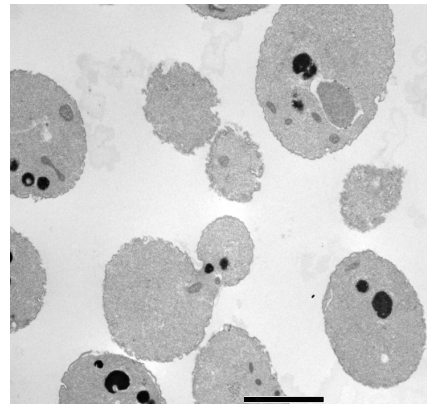

**Supplemental Figure 1.** Control cells for electron microscopy seen in Figure 2C. Wild type and *myo2-iq1,5* cells were grown overnight at 32°C and then shifted to 25°C for 8 hours before fixing and processing for electron microscopy. Bar 1 micron.

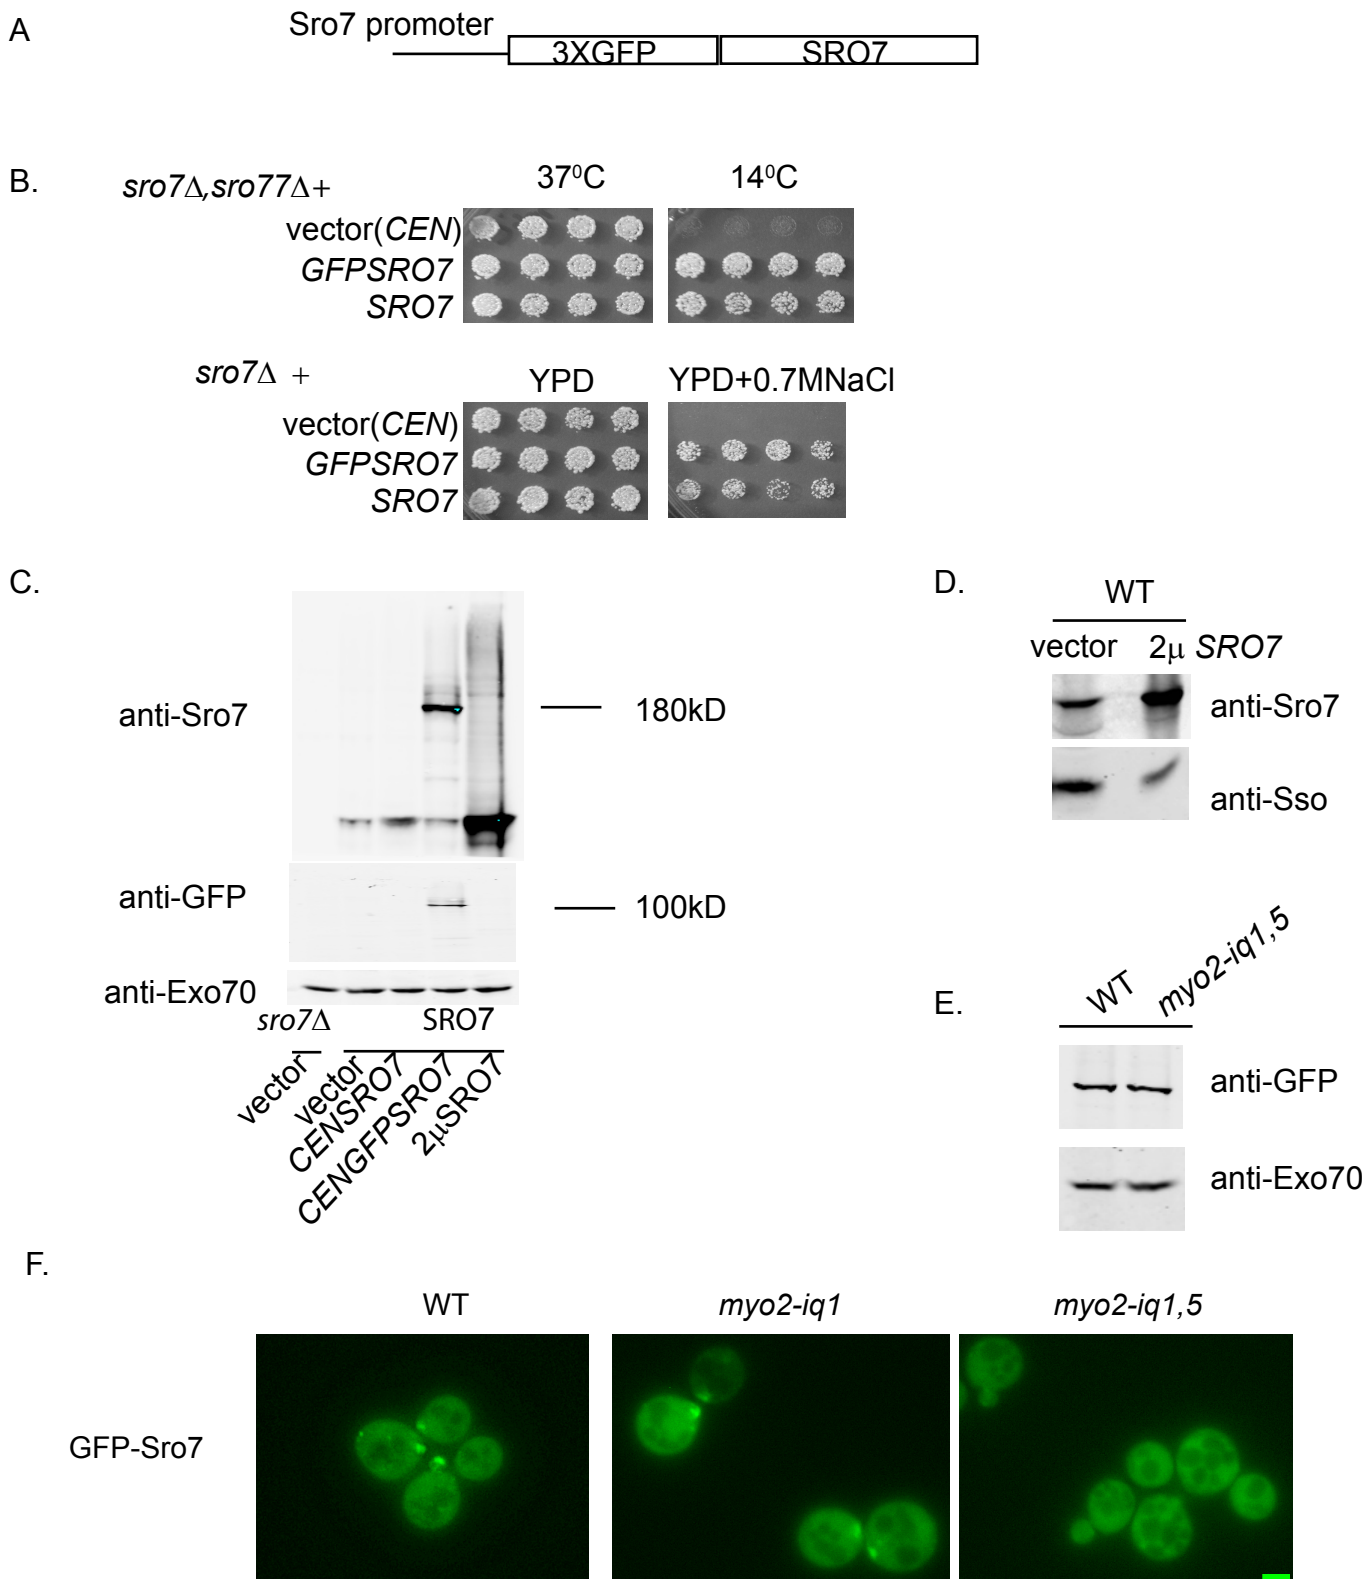

**Supplemental Figure 2.** N-terminally tagged GFP-Sro7 is functional. (A) A schematic of Sro7 tagged with 3 tandem copies of GFP at the N-terminus. (B) *sro7Δ,sro77Δ+* and *sro7Δ* mutant cells were transformed with *GFPSRO7* (*CEN*), *SRO7* (*CEN*) or an empty vector. Individual transformants were picked into microtiter wells and transferred onto SC-ura plates at the indicated temperatures and salt concentrations. (C) Glass bead lysates and Western blot analysis of *sro7Δ* and wild type strains expressing *GFPSRO7* (*CEN*), *Sro7* (*CEN*) or *Sro7* (2μ) using affinity purified anti-Sro7, anti-GFP and control anti-Exo70 antibodies. (D) Glass bead lysates of wild type cells expressing *SRO7*(2μ) or vector only using anti Sro7 and control anti-Sso antibodies show Sro7 is expressed 9.5 times above endogenous levels. Glass bead lysates of WT and *myo2-iq1,5* mutant cells expressing *GFPSRO7* (*CEN*) were subjected to Western blot analysis using anti-GFP and control affinity purified anti-Exo70 antibodies. (E) Wild type, *myo2-iq1* and *myo2-iq1,5* were transformed with *GFPSRO7*(*CEN*). Transformants analysed for GFP-Sro7 fluorescence at sites of polarized growth showed polarized Sro7 fluorescence for *MYO2* and *myo2-iq1*.

A.

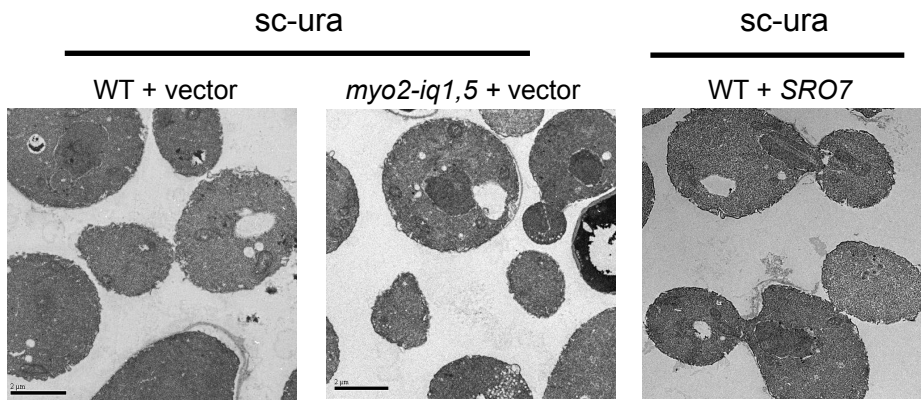

**Supplemental Figure 3.** Control cells for electron microscopy seen in Figure 5C. Wild type and *myo2-iq1,5* mutant cells expressing Sro7 behind a tetracycline repressible promoter (*CEN*) were transformed with *GFP-SEC4* (*CEN*). Cells were grown in selective media in the presence of doxycycline and then shifted to media lacking doxycycline to induce Sro7 expression for 8 hours at 25°C.

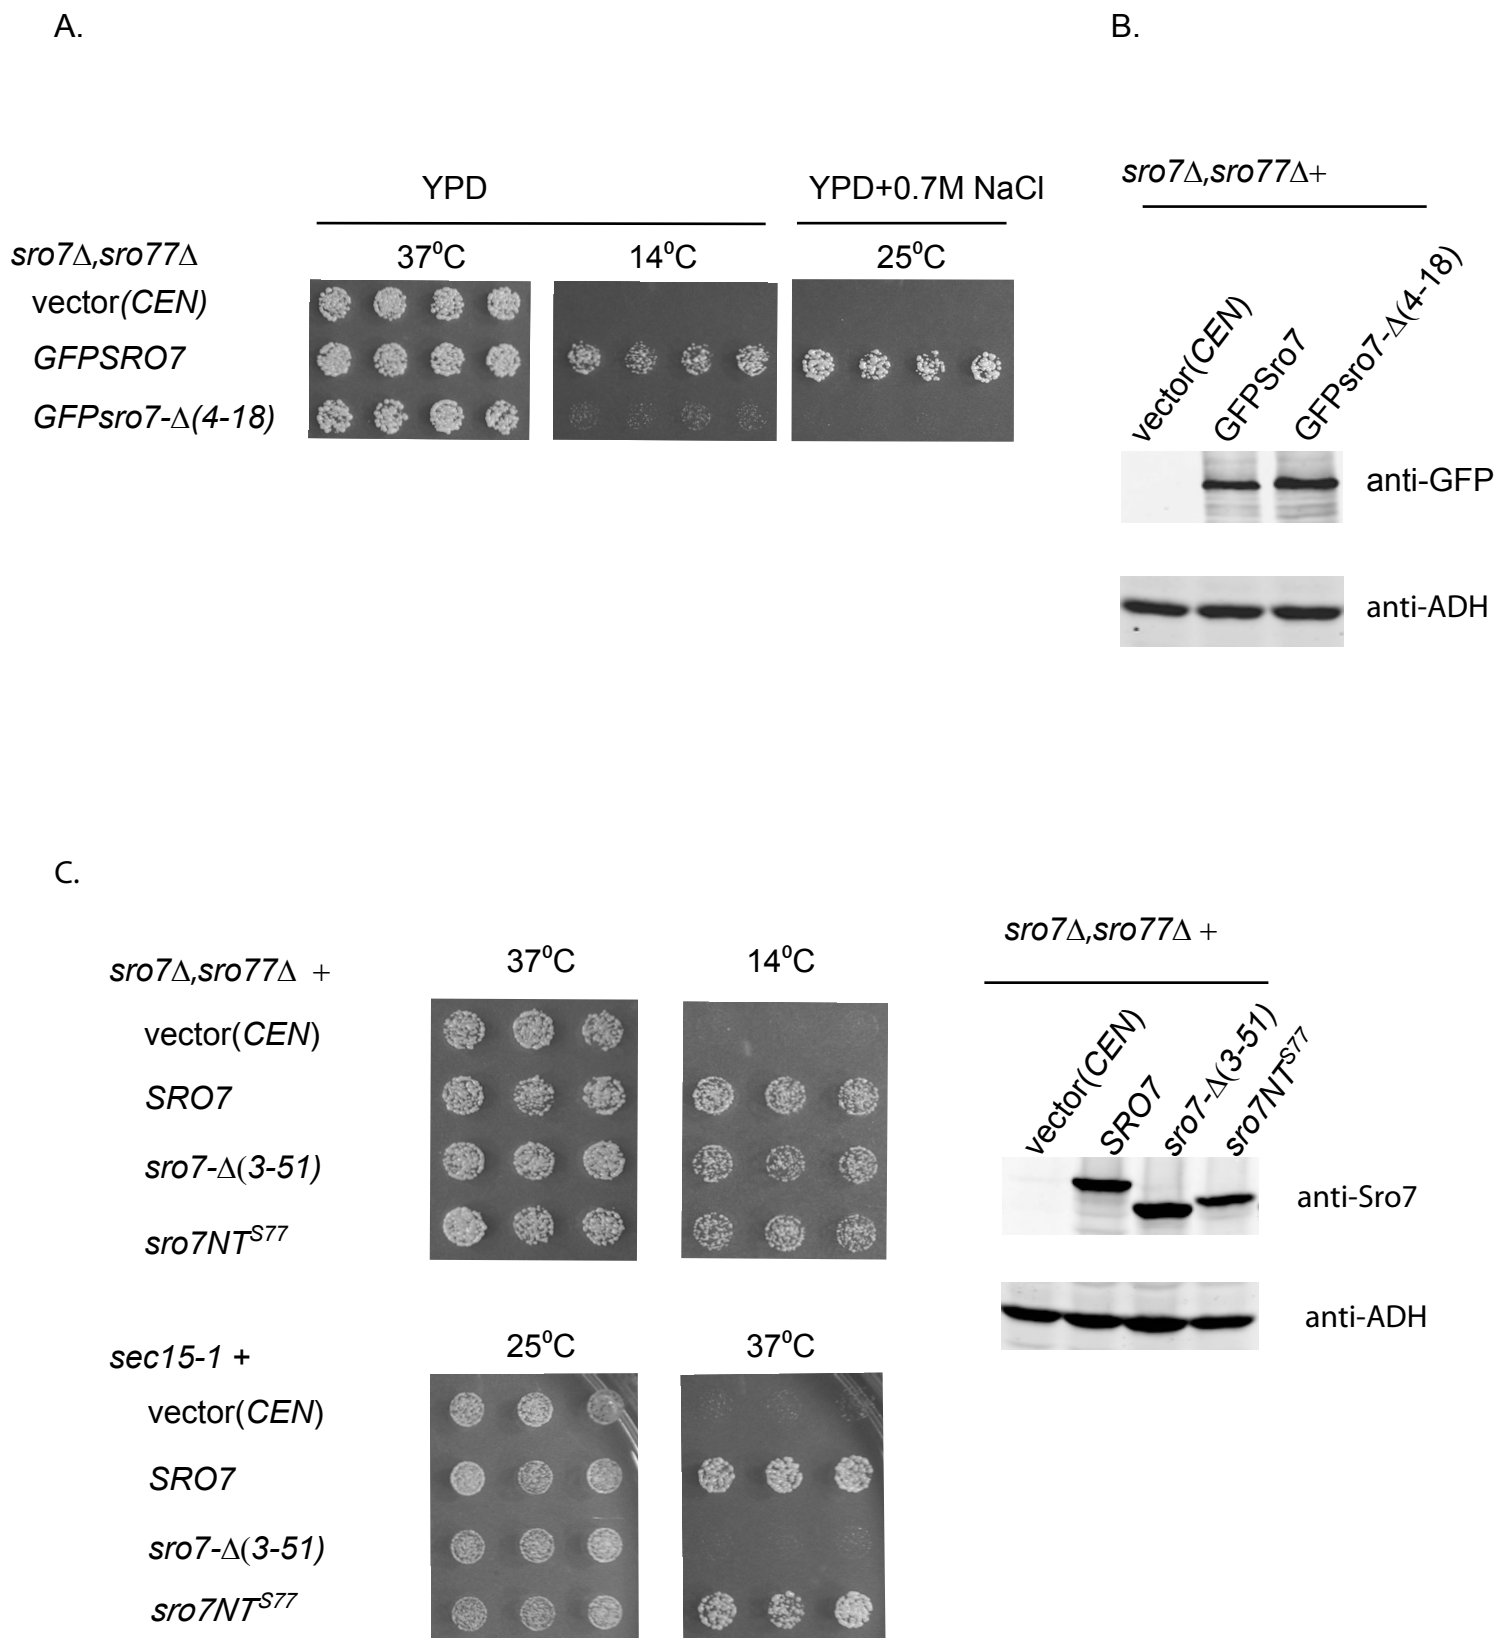

**Supplemental Figure 4.** (A) Mutant *sro7Δ,sro77Δ* cells were transformed with full length and the N-terminal deletion GFP construct. Transformants were picked into microtiter wells and transferred onto plates at the indicated temperatures and salt concentrations. (B) Glass bead lysates and Western blot analysis of *sro7Δ,sro77Δ* cells expressing GFP-Sro7 and GFP-*sro7-Δ(4-18)* were conducted using anti-GFP antibody and anti-ADH antibody as a control. (C) Mutant *sro7Δ,sro77Δ* and *sec15-1* cells were transformed with a (*CEN*) plasmid expressing Sro7, *sro7-Δ(3-51)* and Sro7NT<sup>S77</sup>. Transformants were picked into microtiter plates and transferred onto plates at the indicated temperatures. Glass bead lysates and Western blot analysis of *sro7Δ,sro77Δ* cells expressing Sro7, *sro7-Δ(3-51)* and Sro7NT<sup>S77</sup> were done using anti-Sro7 antibody and anti-ADH antibody as a control.



## Supplemental Table I: Yeast strains used in paper

| <u>Strain</u> | <u>Genotype</u>                                                                              | <u>Reference</u> |
|---------------|----------------------------------------------------------------------------------------------|------------------|
| BY2           | <i>ura3-52</i>                                                                               | P.B.collection   |
| BY40          | <i>ura3-52; sec8-9</i>                                                                       | P.B.collection   |
| BY44          | <i>ura3-52; sec15-1</i>                                                                      | P.B.collection   |
| BY100         | <i>LEU2::sec4P-48; sec4A::HIS3; his3-Δ200; ura3-52</i>                                       | P.B.collection   |
| BY706         | <i>sro7Δ::LEU2; ura3-52; leu2-3,112; his3-Δ200</i>                                           | P.B.collection   |
| BY704         | <i>SRO7; ura3-52; leu2-3,112; his3-Δ200</i>                                                  | P.B.collection   |
| BY855         | <i>sro7Δ::LEU2; sro77A::HIS3; ura3-52; leu2-3,112; his3-Δ200</i>                             | P.B.collection   |
| BY1101        | <i>sro7Δ::LEU2; sro77A::HIS3; ura3-52; his3-Δ200; leu2-3,112; ADH1p-protASro7 (2μ, URA3)</i> | P.B.collection   |
| BY1291        | <i>sro7Δ::LEU2; sro77A::HIS3; ura3-52; his3-Δ200; leu2-3,112; ADH1p-protA (2μ, URA3)</i>     | P.B.collection   |
| BY1660        | <i>MYO2::kanR; ura3-52; leu2-3,112</i>                                                       | This study       |
| BY1661        | <i>myo2-iq1::kanR; ura3-52; leu2-3,112</i>                                                   | This study       |
| BY1662        | <i>myo2-iq5::kanR; ura3-52; leu2-3,112</i>                                                   | This study       |
| BY1663        | <i>myo2-iq1,5::kanR; ura3-52; leu2-3,112</i>                                                 | This study       |
| BY1673        | <i>myo2-iq4::kanR; ura3-52; leu2-3,112</i>                                                   | This study       |
| BY1674        | <i>myo2-iq6kanR; ura3-52; leu2-3,112</i>                                                     | This study       |
| BY1746        | <i>MYO2::kanR; ura3-52; leu2-3,112; his3-Δ200</i>                                            | This study       |
| BY1748        | <i>myo2-iq1,5::kanR; ura3-52; leu2-3,112; his3-Δ200</i>                                      | This study       |
| BY1839        | <i>ura3-52; leu2-3,112; GFP-SRO7(pB1564)</i>                                                 | This study       |
| BY1866        | <i>ura3-52; sec6-4; GFP-SRO7(pB1564)</i>                                                     | This study       |
| BY1872        | <i>ura3-52; leu2-3,112; myo2-66; GFP-SRO7(pB1564)</i>                                        | This study       |
| BY1901        | <i>ura3-52; leu2-3,112; GFP-SEC4(pB1571); RFP-SEC2(pB1566)</i>                               | This study       |
| BY1908        | <i>ura3-52; leu2-3,112; GFP-SRO7(pB1763); RFP-SEC2(pB1566)</i>                               | This study       |
| BY1951        | <i>ura3-52; sec2-41; GFP-SRO7(pB1564)</i>                                                    | This study       |
| BY1991        | <i>MYO2::kanR; ura3-52; leu2-3,112; his3-Δ200; GFP-SRO7(pB1564)</i>                          | This study       |
| BY1992        | <i>MYO2::kanR; ura3-52; leu2-3,112; his3-Δ200; GFP-SEC4(pB1571)</i>                          | This study       |
| BY1993        | <i>MYO2::kanR; ura3-52; leu2-3,112; his3-Δ200; GFP-MLC1(pB1544)</i>                          | This study       |
| BY1994        | <i>myo2-iq1,5::kanR; ura3-52; leu2-3,112; his3-Δ200; GFP-SRO7(pB1564)</i>                    | This study       |
| BY1995        | <i>myo2-iq1,5::kanR; ura3-52; leu2-3,112; his3-Δ200; GFP-SEC4(pB1571)</i>                    | This study       |
| BY1996        | <i>myo2-iq1,5::kanR; ura3-52; leu2-3,112; his3-Δ200; GFP-MLC1(pB1544)</i>                    | This study       |
| BY2026        | <i>myo2-iq3::kanR; ura3-52; leu2-3,112</i>                                                   | This study       |

|        |                                                                                                          |            |
|--------|----------------------------------------------------------------------------------------------------------|------------|
| BY2034 | <i>MYO2::kanR; ura3-52; leu2-3,112; his3-Δ200; GFP-SEC4</i> (pB1571); pCM189 (pB1105)                    | This study |
| BY2035 | <i>MYO2::kanR; ura3-52; leu2-3,112; his3-Δ200; GFP-SEC4</i> (pB1571); <i>SRO7</i> -pCM189 (pB1107)       | This study |
| BY2036 | <i>myo2-iq1,5::kanR; ura3-52; leu2-3,112; his3-Δ200; GFP-SEC4</i> (pB1571); pCM189 (pB1105)              | This study |
| BY2037 | <i>myo2-iq1,5::kanR; ura3-52; leu2-3,112; his3-Δ200; GFP-SEC4</i> (pB1571); <i>SRO7</i> -pCM189 (pB1107) | This study |
| BY2197 | <i>myo2-iq2::kanR; ura3-52; leu2-3,112</i>                                                               | This study |
| BY2250 | Mata/α <i>MYO2/MYO2::myo2-Δ6IQnatR; ura3-52/ura3-52; leu2-3,112 /leu2-3,112</i>                          | This study |
| BY2315 | <i>MYO2::kanR; ura3-52; leu2-3,112; his3-Δ200</i> ; pCM189 (pB1105)                                      | This study |
| BY2316 | <i>MYO2::kanR; ura3-52; leu2-3,112; his3-Δ200; SRO7</i> -pCM189 (pB1107)                                 | This study |
| BY2318 | <i>myo2-iq1,5::kanR; ura3-52; leu2-3,112; his3-Δ200</i> ; pCM189 (pB1105)                                | This study |
| BY2319 | <i>myo2-iq1,5::kanR; ura3-52; leu2-3,112; his3-Δ200; SRO7</i> -pCM189 (pB1107)                           | This study |
| BY2368 | <i>Gal<sup>+</sup> ura3-52; leu2-3,112; his3-Δ200; SRO7</i> in pNB527 (pB1850)                           | This study |
| BY2369 | <i>Gal<sup>+</sup> ura3-52; leu2-3,112; his3-Δ200; SEC15</i> in pNB527 (pB1851)                          | This study |
| BY2370 | <i>Gal<sup>+</sup> sec2-41; leu2-3,112; SRO7</i> in pNB527 (pB1850)                                      | This study |
| BY2371 | <i>Gal<sup>+</sup> sec9-4; leu2-3,112; SRO7</i> in pNB527 (pB1850)                                       | This study |
| BY2375 | <i>Gal<sup>+</sup> ura3-52; leu2-3,112; his3-Δ200</i> ; pNB527(pB24)                                     | This study |
| BY2376 | <i>Gal<sup>+</sup> sec2-41; leu2-3,112</i> ; pNB527(pB24)                                                | This study |
| BY2377 | <i>Gal<sup>+</sup> sec9-4; leu2-3,112</i> ; pNB527(pB24)                                                 | This study |
| BY2378 | <i>Gal<sup>+</sup> sec4-8; leu2-3,112</i> ; pNB527(pB24)                                                 | This study |
| BY2379 | <i>Gal<sup>+</sup> sec2-41; leu2-3,112; SEC15</i> in pNB527(pB1851)                                      | This study |
| BY2380 | <i>Gal<sup>+</sup> sec9-4; leu2-3,112; SEC15</i> in pNB527(pB1851)                                       | This study |
| BY2381 | <i>Gal<sup>+</sup> sec4-8; leu2-3,112; SRO7</i> in pNB527(pB1850)                                        | This study |
| BY2382 | <i>Gal<sup>+</sup> sec4-8; leu2-3,112; SEC15</i> in pNB527(pB1851)                                       | This study |
| BY2583 | <i>ura3-52</i> ; pB1946 ( <i>GFP-SRO7ΔA-18</i> )                                                         | This study |

Supplemental Table II. Plasmids used in this study

| <u>Strain</u> | <u>Host</u>  | <u>Description</u>                                                              |
|---------------|--------------|---------------------------------------------------------------------------------|
| pB497         | DH5 $\alpha$ | <i>SRO7</i> in pRS426 (2 $\mu$ , <i>URA3</i> )                                  |
| pB694         | DH5 $\alpha$ | <i>MYO2</i> in YCp50( <i>CEN,URA3</i> ) L.Weisman                               |
| pB695         | DH5 $\alpha$ | <i>MYO2</i> in pRS413(2 $\mu$ , <i>HIS3</i> ) as a ClaI fragment L. Weisman     |
| pB741         | DH5 $\alpha$ | <i>SRO7</i> in pRS313 ( <i>CEN, HIS3</i> )                                      |
| pB1105        | DH5 $\alpha$ | pCM189 ( <i>CEN,URA3</i> )                                                      |
| pB1107        | DH5 $\alpha$ | <i>SRO7</i> in pCM189 ( <i>CEN,URA3</i> ) as BamHI-NotI subclone                |
| pB1176        | DH5 $\alpha$ | <i>MYO2-<math>\Delta</math>6IQ</i> in pRS172 T.Davis                            |
| pB1240        | BL21         | <i>MLC1</i> in pGEX4T1 as a BamHI-SalI subclone                                 |
| pB1211        | BL21         | <i>SEC9</i> in pGEX4T1 as BamHI-XhoI subclone                                   |
| pB1214        | BL21         | <i>MYO2IQ</i> in pGEX4T1 as BamHI-Sal subclone                                  |
| pB1242        | DH5 $\alpha$ | <i>2XGFP</i> L.Shenkman                                                         |
| pB1486        | DH5 $\alpha$ | <i>MYO2</i> in pRS306 ( <i>URA3,integrative</i> ) as SalI-NotI(ClaI)fragment    |
| pB1487        | DH5 $\alpha$ | <i>myo2-iq1</i> in pB1486 ( <i>MYO2, URA3, integrative</i> ) as EcoRI-BamHI     |
| pB1488        | DH5 $\alpha$ | <i>myo2-iq5</i> in pB1486 ( <i>MYO2, URA3, integrative</i> ) as EcoRI-BamHI     |
| pB1489        | DH5 $\alpha$ | <i>myo2-iq1,iq5</i> in pB1486 ( <i>MYO2, URA3, integrative</i> ) as EcoRI-BamHI |
| pB1490        | DH5 $\alpha$ | <i>myo2-iq2</i> in pB1486 ( <i>MYO2, URA3, integrative</i> ) as EcoRI-BamHI     |
| pB1491        | DH5 $\alpha$ | <i>myo2-iq3</i> in pB1486 ( <i>MYO2, URA3, integrative</i> ) as EcoRI-BamHI     |
| pB1492        | DH5 $\alpha$ | <i>myo2-iq4</i> in pB1486 ( <i>MYO2, URA3, integrative</i> ) as EcoRI-BamHI     |
| pB1493        | DH5 $\alpha$ | <i>myo2-iq6</i> in pB1486 ( <i>MYO2, URA3, integrative</i> ) as EcoRI-BamHI     |
| pB1544        | DH5 $\alpha$ | <i>GFP-MLC1</i> in pUG34 ( <i>CEN, HIS</i> ) E.Bi                               |
| pB1564        | DH5 $\alpha$ | <i>3XGFP-SRO7</i> in pRS316 ( <i>CEN, URA3</i> )                                |
| pB1561        | DH5 $\alpha$ | <i>SRO7(<math>\Delta</math>3-52)</i> in pCM189 ( <i>URA, CEN</i> )              |
| pB1566        | DH5 $\alpha$ | <i>RFP-SEC2</i> in pRS316 ( <i>CEN, URA3</i> ) R. Collins                       |
| pB1571        | DH5 $\alpha$ | <i>GFP-SEC4</i> in pRS315 ( <i>CEN, LEU2</i> ) R. Collins                       |
| pB1763        | DH5 $\alpha$ | <i>3XGFP-SRO7</i> in pRS315 ( <i>CEN, LEU2</i> )                                |
| pB1816        | DH5 $\alpha$ | <i>SEC15</i> in pCM189 ( <i>CEN, URA3</i> ) as BamHI-Not I                      |

|        |              |                                                                                   |
|--------|--------------|-----------------------------------------------------------------------------------|
| pB1850 | DH5 $\alpha$ | <i>SRO7</i> in pNB527 ( <i>GAL</i> , <i>LEU2</i> , integrative) as BamHI-HindIII  |
| pB1851 | DH5 $\alpha$ | <i>SEC15</i> in pNB527 ( <i>GAL</i> , <i>LEU2</i> , integrative) as BamHI-HindIII |
| pB1946 | DH5 $\alpha$ | <i>3XGFP-SRO7</i> ( $\Delta 4-18$ ) in pRS316 ( <i>CEN</i> , <i>URA3</i> )        |
| pB1947 | DH5 $\alpha$ | <i>SRO7</i> ( $\Delta 4-18$ ) in pCM189 as BamHI-Not I                            |
| pB1976 | DH5a         | Myo2-IQ (782-990) in pGEX6P-1 as BamHI-Sall                                       |
| pB1980 | DH5a         | Myo2-IQ1,5 (782-990) in pGEX6P-1 as BamHI-Sall                                    |
